# Supplementary material
Source: Springer Nature journal article supplement (https://www.springermedizin.de/resource/supplementary/12906_2013_1570_MOESM1_ESM.pdf/9522278)
Supplement: MOESM1 [file 9522278]

7404 phone calls made

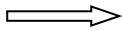

2509 invalid phone numbers:  
non-household lines (e.g. businesses)  
phone numbers not in use  
fax machines,  
out-of service lines

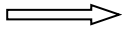

2812 No pick-up of working phone line  
(eligibility for study unknown)

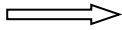

514 Phone line picked up but no eligible  
respondents at home despite repeated calls

---

1569  
Eligible contacts

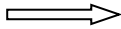

449 refused to participate

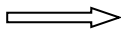

19 incomplete interviews

1100  
Completed  
interviews
